# Supplementary material for: Monoamine oxidase‐A is a novel driver of stress‐induced premature senescence through inhibition of parkin‐mediated mitophagy
Source: PubMed Central journal article supplement (PMC6156293; doi:10.1111/acel.12811), 2018-07-12
Supplement: ACEL-17-e12811-s001.pdf [file ACEL-17-e12811-s001.pdf]

**A**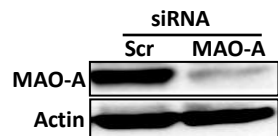**B**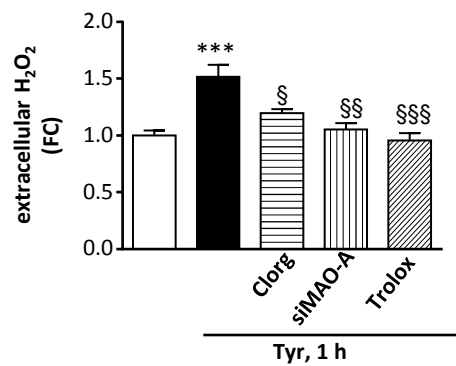**C**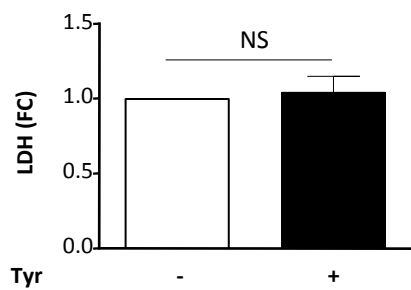**D**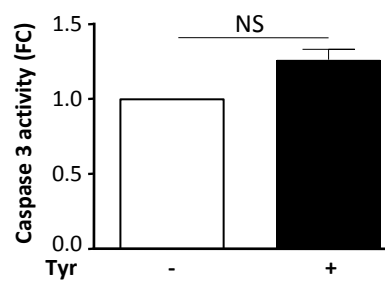**E**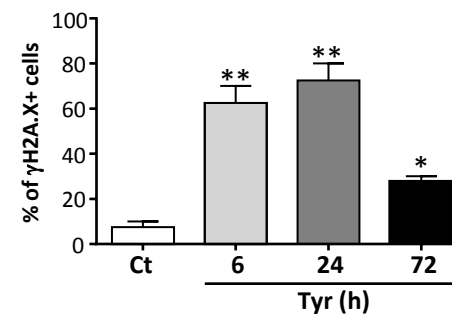**F**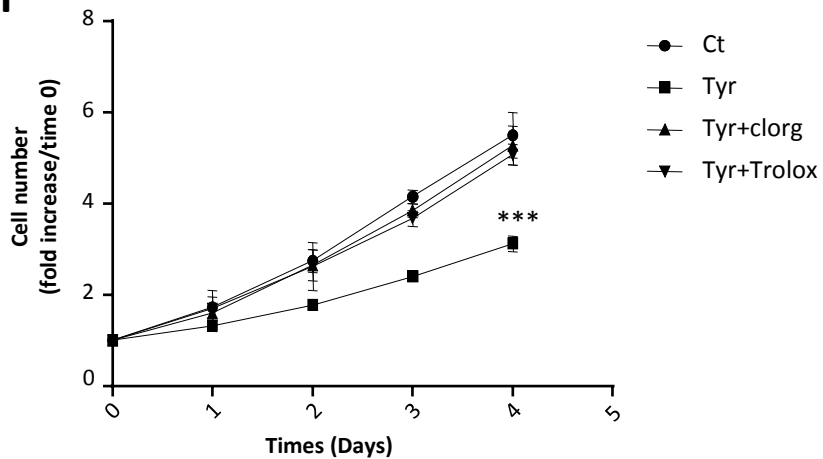

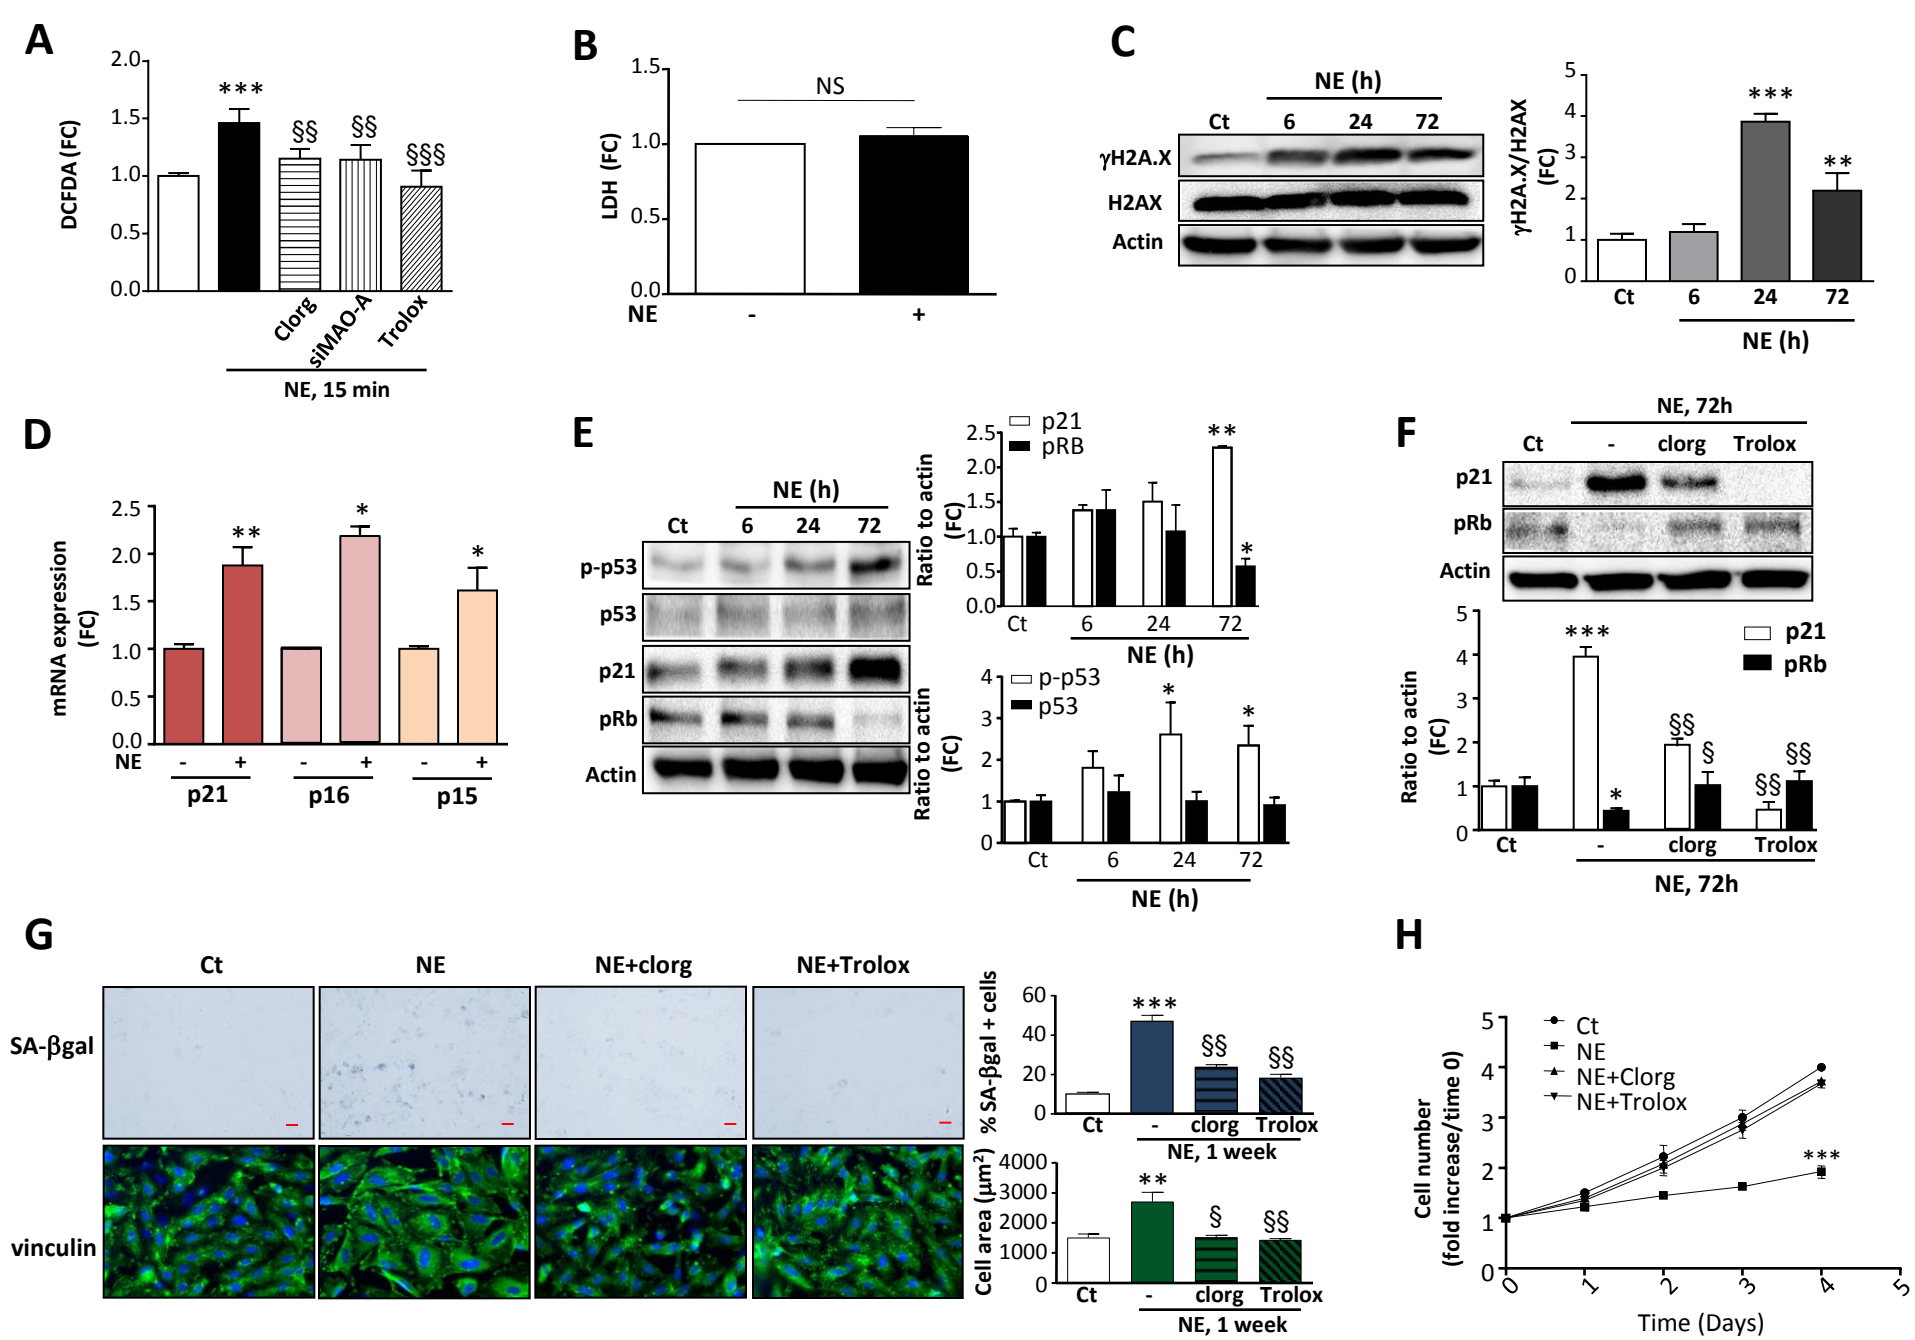

Supplementary Fig 2

**A**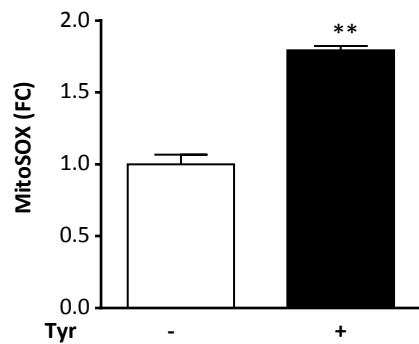**B**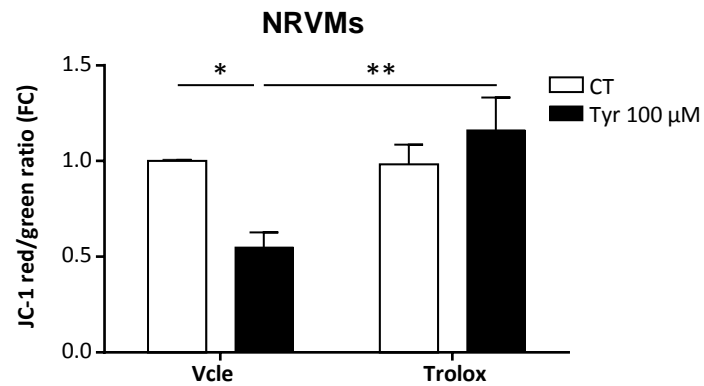**C**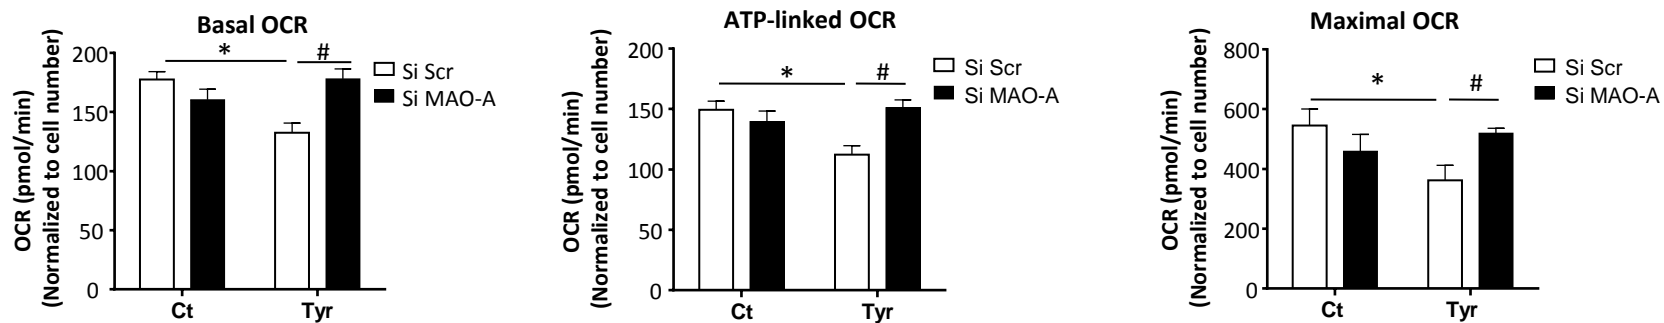**D**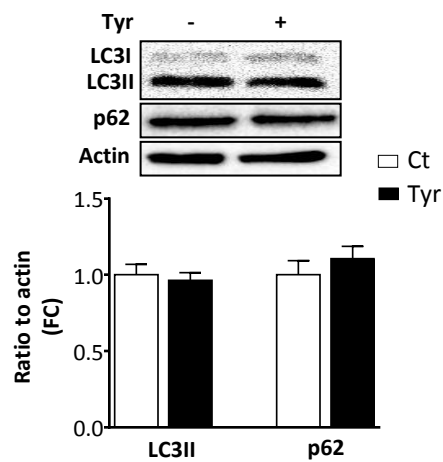**E**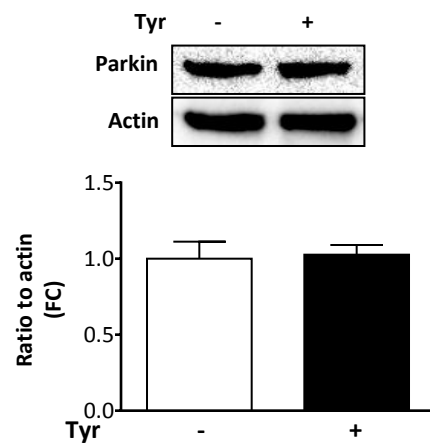

**A**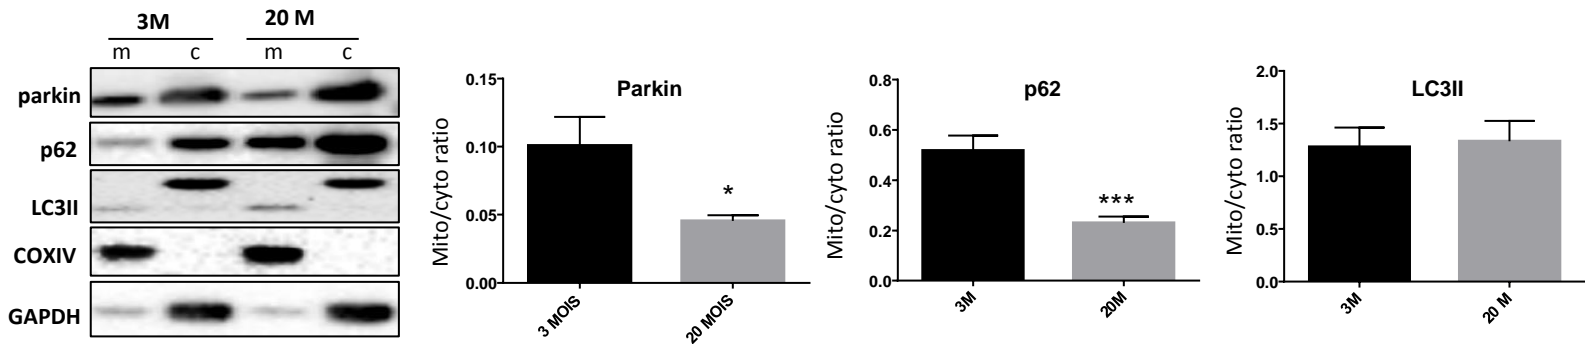**B**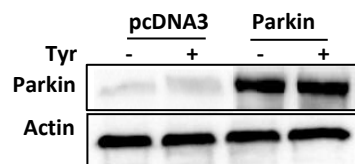**C**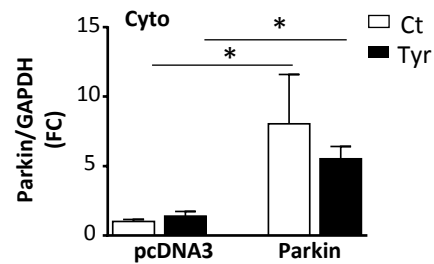**D**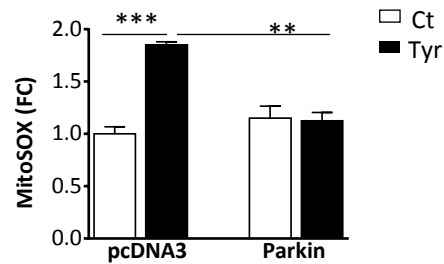**E**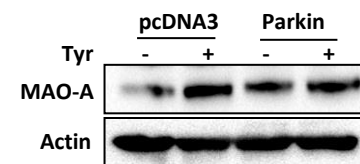**F**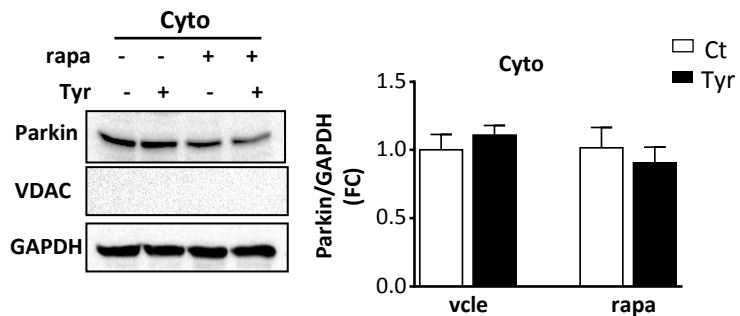**G**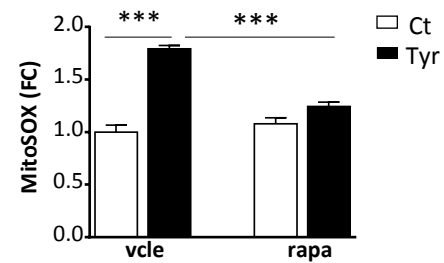

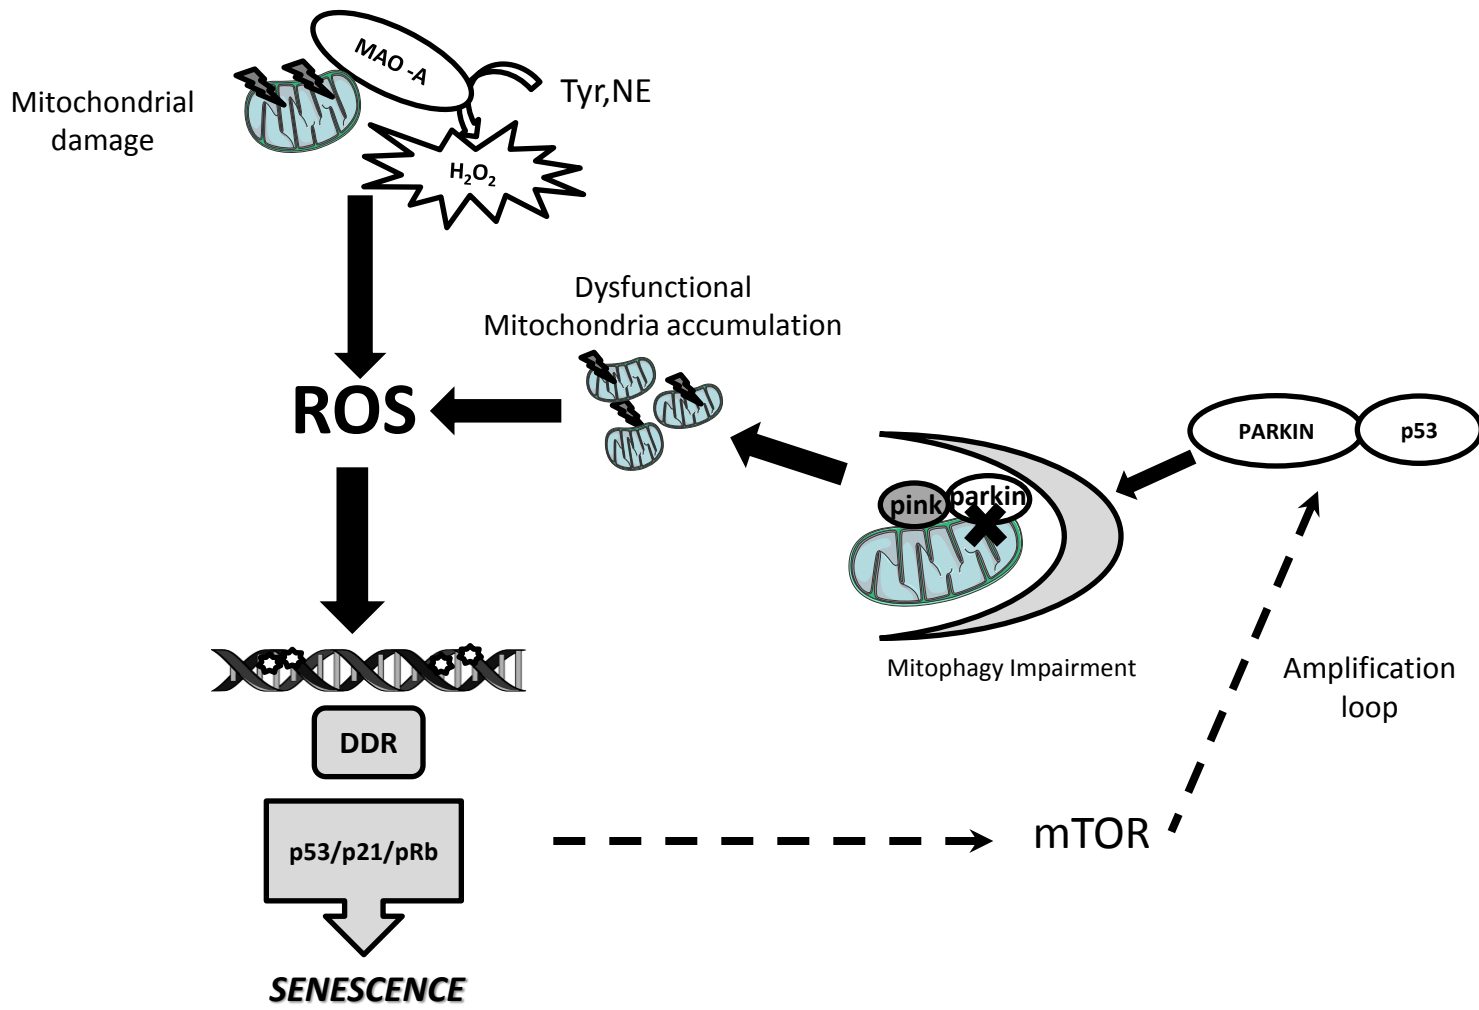

Supplementary Fig 5
